# Supplementary material for: Finite Set Intervals in Oz.
Source: Springer Nature journal article supplement (doi:10.1007/s00392-023-02247-8), 1997-01-01
Supplement: MOESM1 [file 25596264]

# Supplementary Material

## High interindividual variability in LDL-cholesterol reductions after inclisiran administration in a “real-world” setting in Germany

Makhmudova U<sup>1,8,9</sup>, Schatz U<sup>2</sup>, Perakakis N<sup>2,3,4</sup>, Kassner U<sup>5</sup>, Schumann F<sup>5</sup>, Axthelm C<sup>6</sup>, Stürzebecher P<sup>7</sup>, Sinning DL<sup>8</sup>, Doevelaar A<sup>10</sup>, Rohn B<sup>10</sup>, Westhoff T<sup>10</sup>, Vogt A<sup>11</sup>, Scholl M<sup>12</sup>, Kästner U<sup>12</sup>, Geiling J-A<sup>1</sup>, Stach K<sup>13</sup>, Mensch J<sup>14</sup>, Lorenz E<sup>15</sup>, Paitazoglou C<sup>16,17</sup>, Eitel I<sup>16,17</sup>, Bäßler A<sup>18</sup>, Steinhagen-Thiessen E<sup>5,9,14</sup>, Koenig W<sup>15,19,20</sup>, Schulze PC<sup>1</sup>, Landmesser U<sup>8,9</sup>, Laufs U<sup>7</sup>, Weingärtner O<sup>1</sup> for the GERMAN INCLISIRAN NETWORK (GIN)

<sup>1</sup>Klinik für Innere Medizin I, University Hospital Jena, Jena

<sup>2</sup>Department of Internal Medicine III, University Hospital Carl Gustav Carus, Technische Universität Dresden, Dresden, Germany

<sup>3</sup>Paul Langerhans Institute Dresden (PLID), Helmholtz Center Munich, University Hospital and Faculty of Medicine, TU Dresden, Dresden, Germany

<sup>4</sup>German Center for Diabetes Research (DZD e.V.), Neuherberg, Germany

<sup>5</sup>Clinic for Endocrinology and Metabolic Medicine, Charité – University Medicine Berlin, Berlin

<sup>6</sup>Cardiologicum Dresden and Pirna, Dresden, Germany

<sup>7</sup>Klinik und Poliklinik für Kardiologie, Universitätsklinikum Leipzig, Germany;

<sup>8</sup>Deutsches Herzzentrum der Charité, Department of Cardiology, Angiology and Intensive Care Medicine, Berlin, Germany

<sup>9</sup>Friede Springer Cardiovascular Prevention Center, Berlin, Germany

<sup>10</sup>Medical Clinic I, Marien Hospital Herne, University Hospital of the Ruhr-University of Bochum, Herne, Germany

<sup>11</sup>Medical Clinic and Policlinic IV, University Hospital München, Germany

<sup>12</sup>Nephrocare Mühlhausen GmbH, Medical Care Centre, Mühlhausen/Thüringen, Germany

<sup>13</sup>University Hospital Mannheim, Medical Clinic V, Mannheim, Germany

<sup>14</sup>Institute for Clinical Chemistry, University Medicine Rostock, Rostock, Germany

<sup>15</sup>Deutsches Herzzentrum München, Technische Universität München, Munich, Germany

<sup>16</sup>Medizinische Klinik II, Universitätsklinikum Schleswig-Holstein, Lübeck, Germany

<sup>17</sup>German Centre for Cardiovascular Research (DZHK), partner site Hamburg-Kiel-Lübeck, Lübeck, Germany

<sup>18</sup> Klinik für Innere Medizin II, Universitätsklinikum Regensburg, Regensburg, Germany

<sup>19</sup>German Centre for Cardiovascular Research (DZHK), partner site Munich Heart Alliance, Munich, Germany

<sup>20</sup>Institute of Epidemiology and Medical Biometry, University of Ulm, Ulm, Germany

# German Inclisiran Network

14 sites

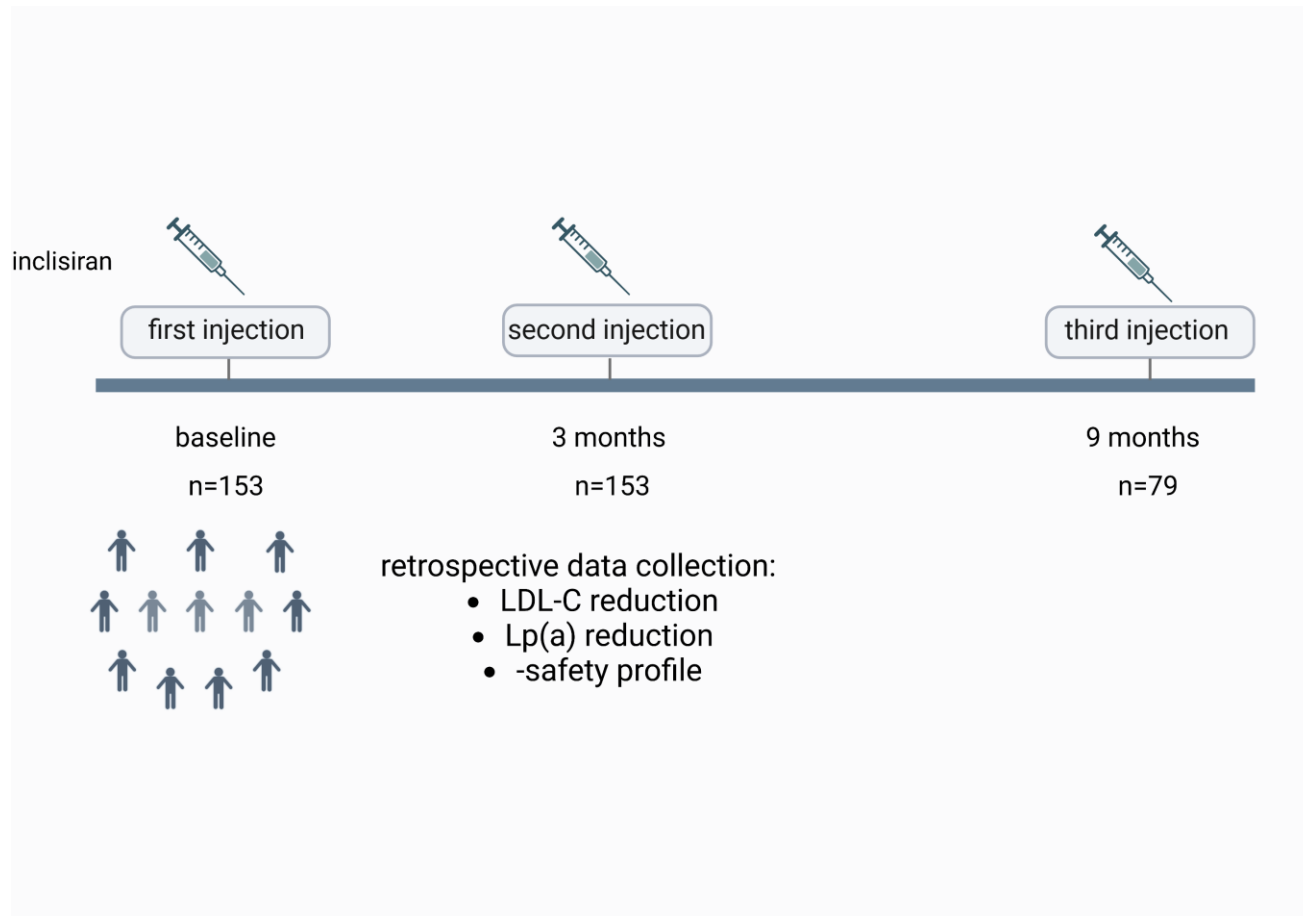

| Center |                                                                 |
|--------|-----------------------------------------------------------------|
| 1      | University Hospital Leipzig                                     |
| 2      | University Hospital Carl Gustav Carus, Dresden                  |
| 3      | Munich Heart Center                                             |
| 4      | Charité University Hospital (Deutsches Herzzentrum der Charité) |
| 5      | Charité University Hospital (Department of Endocrinology)       |
| 6      | Jena University Hospital                                        |
| 7      | Dresden outpatient clinic "Cardiologicum Dresden und Pirna"     |
| 8      | Nephocare Mühlhausen GmbH                                       |
| 9      | University Hospital of the Ruhr-University of Bochum            |
| 10     | University Medicine Rostock                                     |
| 11     | University Hospital Munich                                      |
| 12     | University Hospital Mannheim                                    |
| 13     | University Hospital Lübeck                                      |
| 14     | University Hospital Regensburg                                  |

Supplementary figure 1. Study description. Created with BioRender.com

Supplementary Table 1. List of participating sites.

**3 months (n=153)**

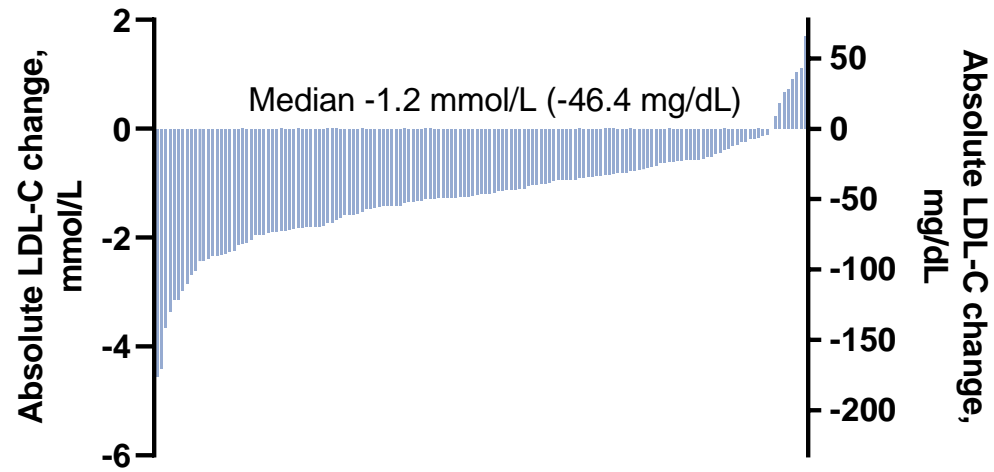

**9 months (n=79)**

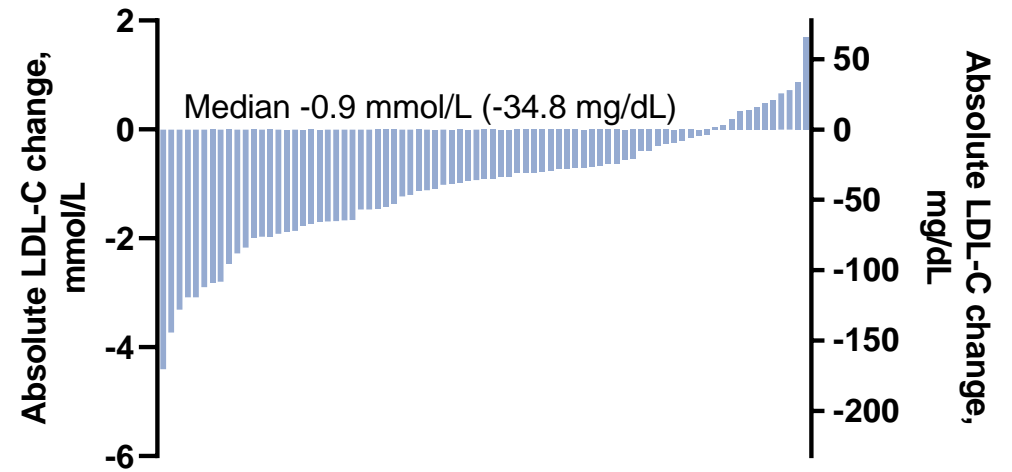

**Supplementary figure 2.** Absolute changes in LDL-C at 3 and 9 months.

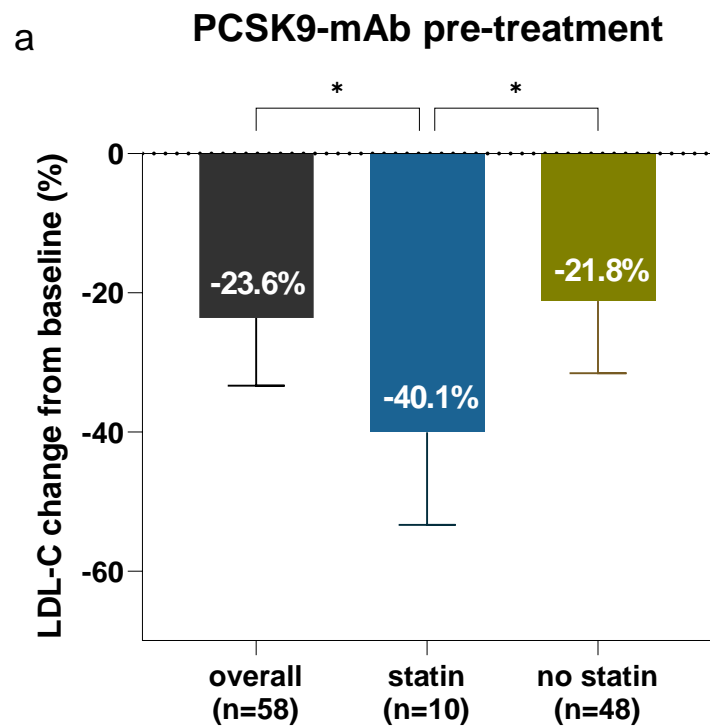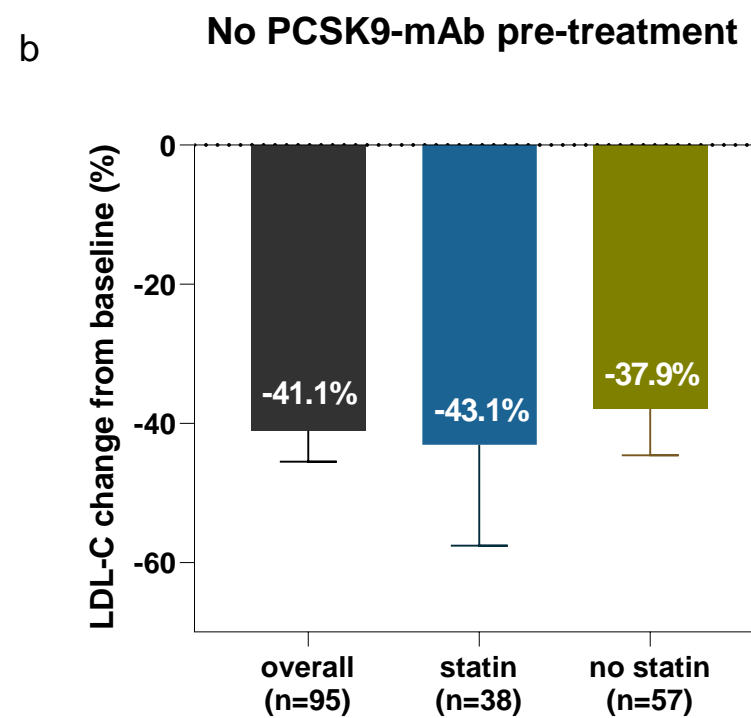

**Supplementary figure 3.** LDL-C change from baseline (%) in patients PCSK9-mAb history (a) vs no-PCSK9-mAb history (b) shown as median and IQR.

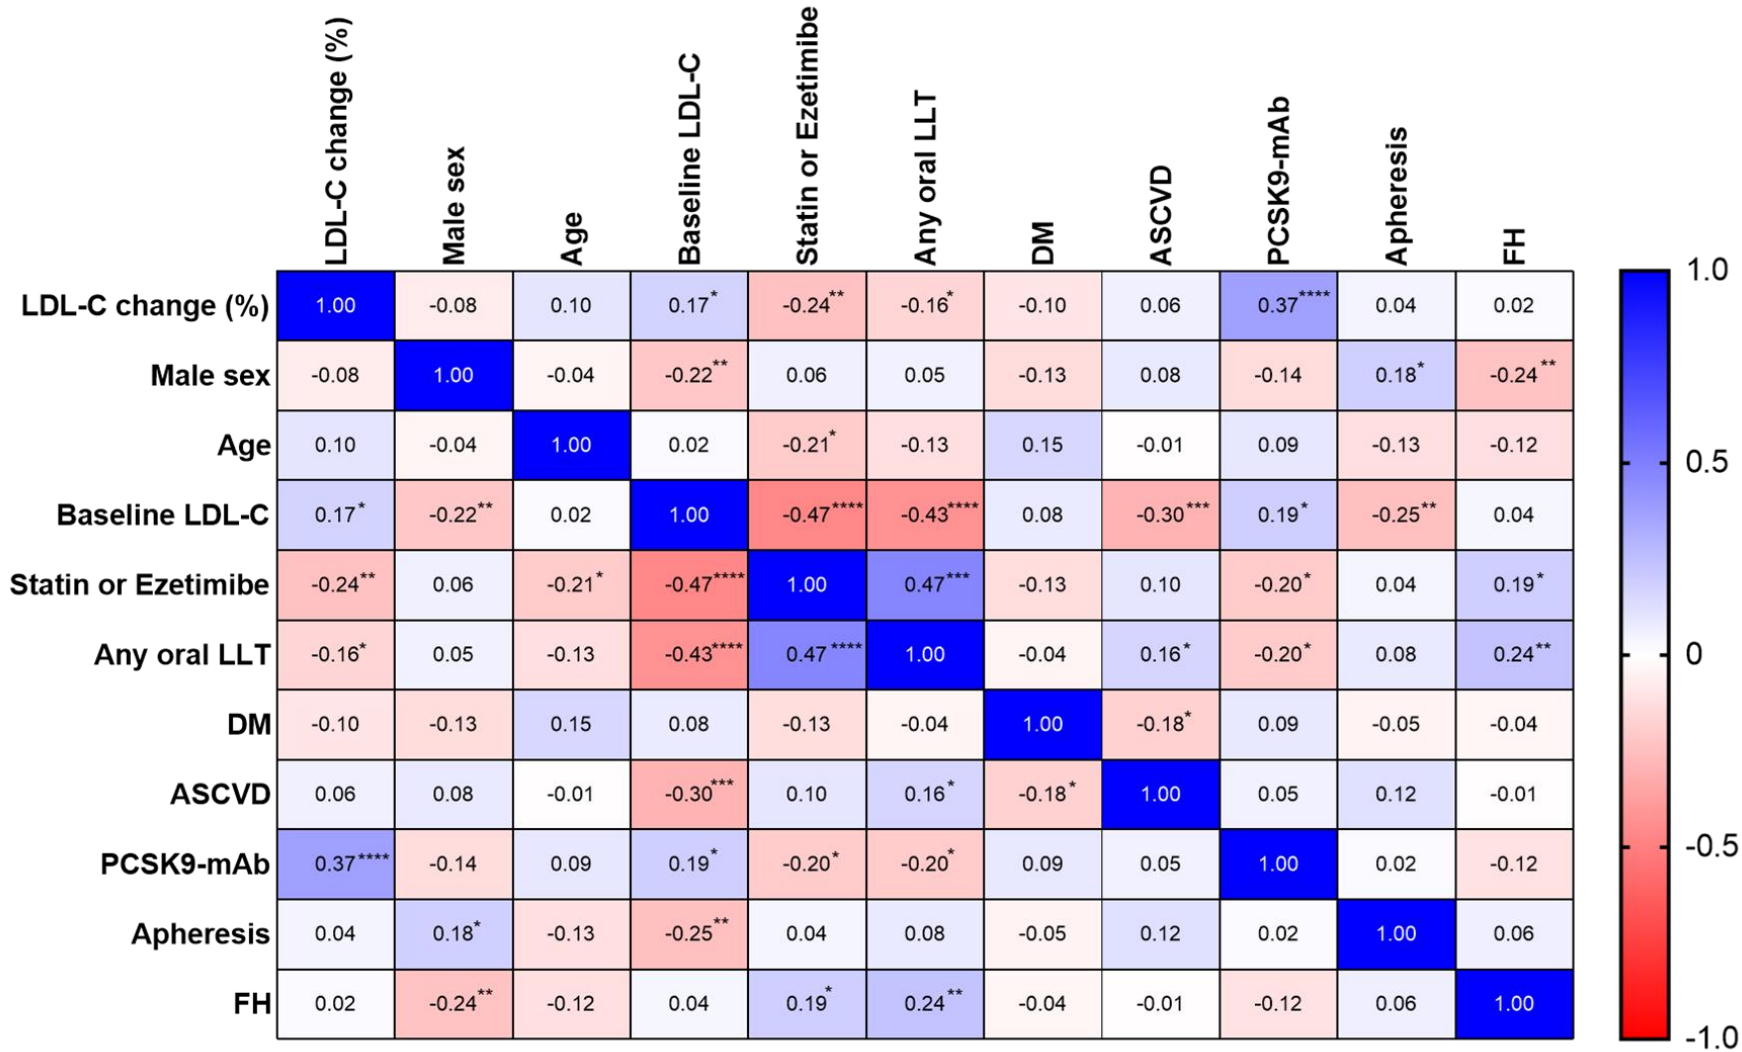

**Supplementary figure 4. Heatmap correlations between relative LDL-C change from baseline (%) and demographic and clinical parameters.**

\*p<0.05, \*\*p<0.01, \*\*\*p<0.001, \*\*\*\*p<0.0001

ASCVD, atherosclerotic cardiovascular disease; DM, diabetes mellitus, PCSK9-mAb, proprotein convertase subtilisin/kexin type 9 monoclonal antibody.

Lp(a) change from baseline (%)

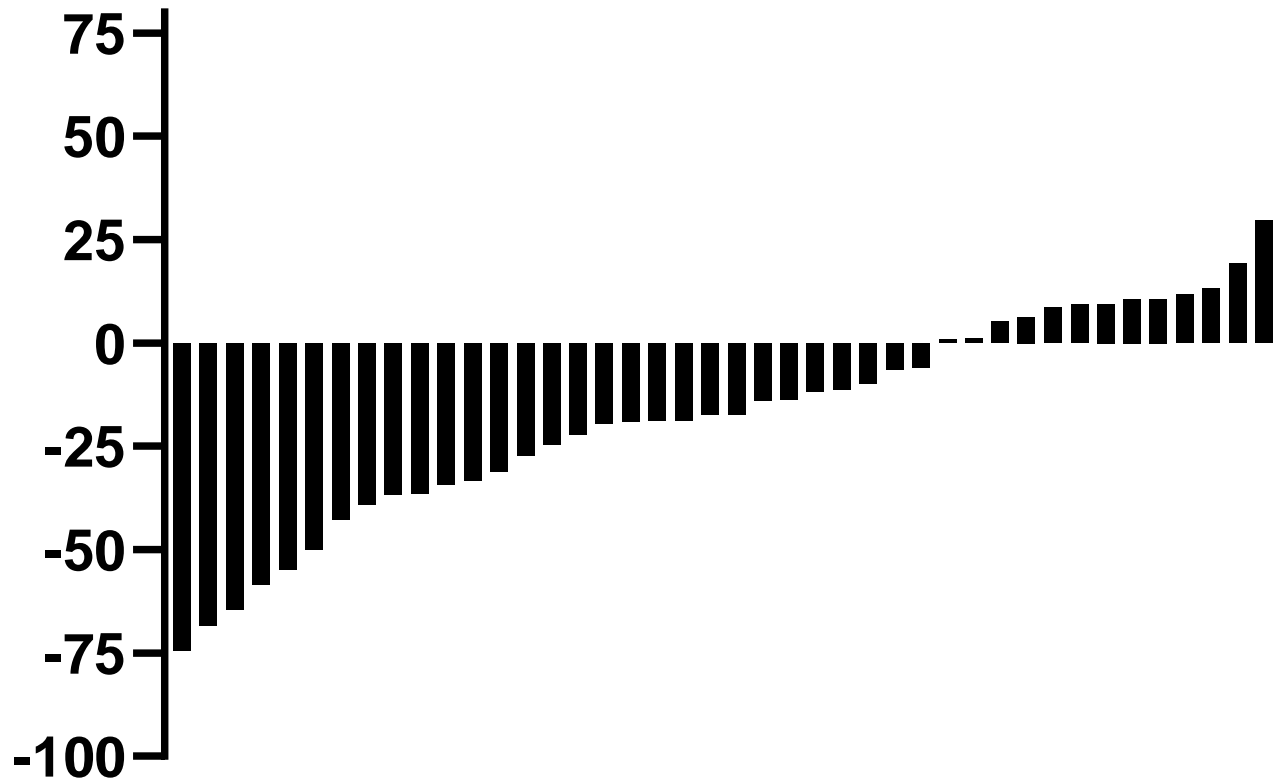

**Supplementary figure 5.** Waterfall plot of Lp(a) change from baseline (%) after inclisiran injection (3 months). Waterfall plot shows individual variations in Lp(a) reduction in 42 patients, qualified for the analysis.

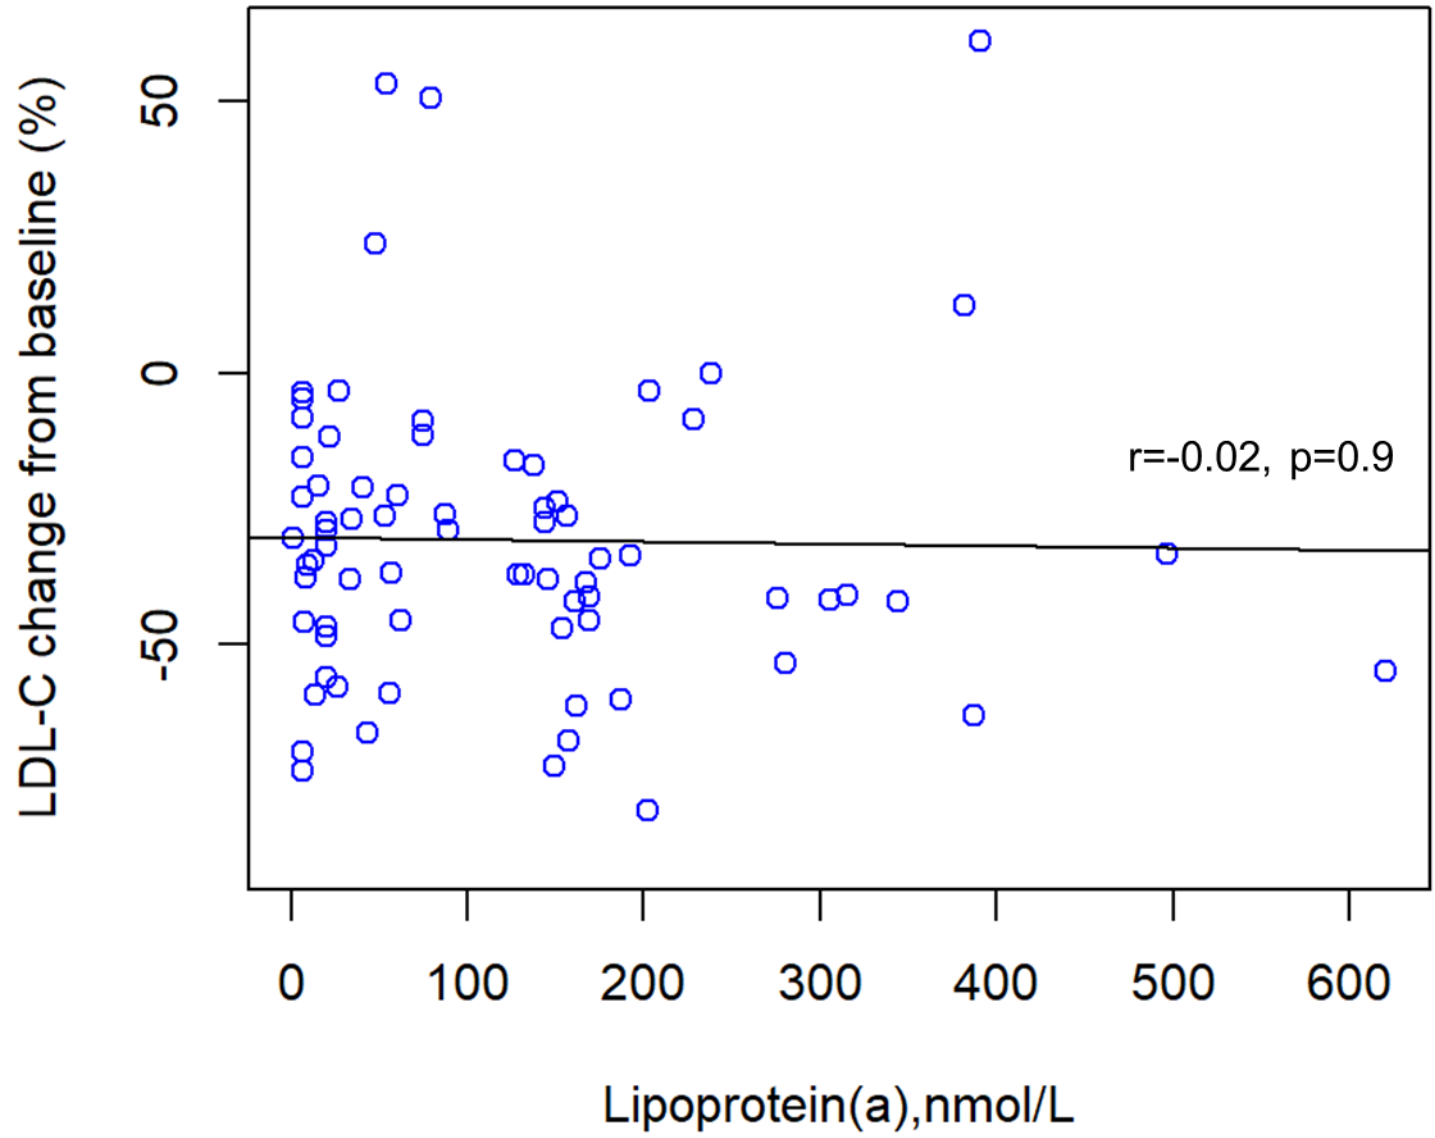

**Supplementary figure 6.** Correlation between LDL-C change from baseline (%) and baseline lipoprotein(a) concentrations.
